# Supplementary material
Source: PubMed Central journal article supplement (PMC3634152)
Supplement: Supp_Table1.pdf [file Supp_Table1.pdf]

## Supplementary Data

SUPPLEMENTARY TABLE S1. COMPARISON OF MEAN  
FRAME-WISE DISPLACEMENT BETWEEN CONDITIONS

| <i>Subject</i> | <i>Mean FD (mm)</i> |                 |
|----------------|---------------------|-----------------|
|                | <i>Awake</i>        | <i>Sedation</i> |
| 1              | 0.0717              | 0.0755          |
| 2              | 0.0615              | 0.0769          |
| 3              | 0.0612              | 0.1511          |
| 4              | 0.0379              | 0.0580          |
| 5              | 0.0618              | 0.0389          |
| 6              | 0.0686              | 0.0727          |
| 7              | 0.0541              | 0.0279          |
| 8              | 0.0824              | 0.0605          |
| 9              | 0.0684              | 0.0752          |
| 10             | 0.0653              | 0.0751          |
| 11             | 0.0597              | 0.0765          |
| 12             | 0.0398              | 0.0455          |
| 13             | 0.0635              | 0.0498          |
| 14             | 0.0556              | 0.0899          |
| 15             | 0.0373              | 0.0408          |
| 16             | 0.0589              | 0.0658          |
| 17             | 0.0500              | 0.0464          |
| 18             | 0.0891              | 0.0806          |
| 19             | 0.0370              | 0.0712          |
| 20             | 0.0776              | 0.0800          |
| 21             | 0.0605              | 0.0692          |
| 22             | 0.0878              | 0.0583          |
| 23             | 0.0411              | 0.0467          |
| 24             | 0.0718              | 0.0464          |
| 25             | 0.0500              | 0.0763          |
| 26             | 0.0526              | 0.0447          |
| 27             | 0.0605              | 0.0409          |
| 28             | 0.0617              | 0.1049          |
| Mean*          | 0.0603              | 0.0659          |
| SD             | 0.0143              | 0.0246          |

\*No significant difference between states [paired *t*-test;  $t(27) = 1.1801$ ;  $p = 0.2483$ ].

FD, frame-wise displacement; SD, standard deviation.
