# Supplementary material
Source: PubMed Central journal article supplement (PMC3634152)
Supplement: Supp_Table2.pdf [file Supp_Table2.pdf]

SUPPLEMENTARY TABLE S2. LOBE ASSIGNMENT OF AUTOMATED ANATOMICAL LABELING REGIONS

| <i>AAL description</i> | <i>AAL label</i> | <i>Lobe</i> | <i>AAL description</i> | <i>AAL label</i> | <i>Lobe</i> |
|------------------------|------------------|-------------|------------------------|------------------|-------------|
| Precentral_L           | FAG              | Frontal     | Occipital_Sup_L        | O1G              | Occipital   |
| Precentral_R           | FAD              | Frontal     | Occipital_Sup_R        | O1D              | Occipital   |
| Frontal_Sup_L          | F1G              | Frontal     | Occipital_Mid_L        | O2G              | Occipital   |
| Frontal_Sup_R          | F1D              | Frontal     | Occipital_Mid_R        | O2D              | Occipital   |
| Frontal_Sup_Orb_L      | F1OG             | Frontal     | Occipital_Inf_L        | O3G              | Occipital   |
| Frontal_Sup_Orb_R      | F1OD             | Frontal     | Occipital_Inf_R        | O3D              | Occipital   |
| Frontal_Mid_L          | F2G              | Frontal     | Fusiform_L             | FUSIG            | Occipital   |
| Frontal_Mid_R          | F2D              | Frontal     | Fusiform_R             | FUSID            | Occipital   |
| Frontal_Mid_Orb_L      | F2OG             | Frontal     | Postcentral_L          | PAG              | Parietal    |
| Frontal_Mid_Orb_R      | F2OD             | Frontal     | Postcentral_R          | PAD              | Parietal    |
| Frontal_Inf_Oper_L     | F3OPG            | Frontal     | Parietal_Sup_L         | P1G              | Parietal    |
| Frontal_Inf_Oper_R     | F3OPD            | Frontal     | Parietal_Sup_R         | P1D              | Parietal    |
| Frontal_Inf_Tri_L      | F3TG             | Frontal     | Parietal_Inf_L         | P2G              | Parietal    |
| Frontal_Inf_Tri_R      | F3TD             | Frontal     | Parietal_Inf_R         | P2D              | Parietal    |
| Frontal_Inf_Orb_L      | F3OG             | Frontal     | SupraMarginal_L        | GSMG             | Parietal    |
| Frontal_Inf_Orb_R      | F3OD             | Frontal     | SupraMarginal_R        | GSMR             | Parietal    |
| Rolandic_Oper_L        | ORG              | Frontal     | Angular_L              | GAG              | Parietal    |
| Rolandic_Oper_R        | ORD              | Frontal     | Angular_R              | GAD              | Parietal    |
| Supp_Motor_Area_L      | SMAG             | Frontal     | Precuneus_L            | PQG              | Parietal    |
| Supp_Motor_Area_R      | SMAD             | Frontal     | Precuneus_R            | PQD              | Parietal    |
| Olfactory_L            | COBG             | Frontal     | Paracentral_Lobule_L   | LPCG             | Parietal    |
| Olfactory_R            | COBD             | Frontal     | Paracentral_Lobule_R   | LPCD             | Parietal    |
| Frontal_Sup_Medial_L   | FMG              | Frontal     | Caudate_L              | NCG              | Subcortical |
| Frontal_Sup_Medial_R   | FMD              | Frontal     | Caudate_R              | NCD              | Subcortical |
| Frontal_Med_Orb_L      | FMOG             | Frontal     | Putamen_L              | NLG              | Subcortical |
| Frontal_Med_Orb_R      | FMOD             | Frontal     | Putamen_R              | NLD              | Subcortical |
| Rectus_L               | GRG              | Frontal     | Pallidum_L             | PALLG            | Subcortical |
| Rectus_R               | GRD              | Frontal     | Pallidum_R             | PALLD            | Subcortical |
| Insula_L               | ING              | Frontal     | Thalamus_L             | THAG             | Subcortical |
| Insula_R               | IND              | Frontal     | Thalamus_R             | THAD             | Subcortical |
| Cingulum_Ant_L         | CIAG             | Frontal     | Heschl_L               | HESCHLG          | Temporal    |
| Cingulum_Ant_R         | CIAD             | Frontal     | Heschl_R               | HESCHLD          | Temporal    |
| Cingulum_Mid_L         | CINMG            | Frontal     | Temporal_Sup_L         | T1G              | Temporal    |
| Cingulum_Mid_R         | CINMD            | Frontal     | Temporal_Sup_R         | T1D              | Temporal    |
| Cingulum_Post_L        | CIPG             | Parietal    | Temporal_Pole_Sup_L    | T1AG             | Temporal    |
| Cingulum_Post_R        | CIPD             | Parietal    | Temporal_Pole_Sup_R    | T1AD             | Temporal    |
| Hippocampus_L          | HIPPOG           | Temporal    | Temporal_Mid_L         | T2G              | Temporal    |
| Hippocampus_R          | HIPPOD           | Temporal    | Temporal_Mid_R         | T2D              | Temporal    |
| ParaHippocampal_L      | PARA_HIPPOG      | Temporal    | Temporal_Pole_Mid_L    | T2AG             | Temporal    |
| ParaHippocampal_R      | PARA_HIPPOD      | Temporal    | Temporal_Pole_Mid_R    | T2AD             | Temporal    |
| Amygdala_L             | AMYGDG           | Temporal    | Temporal_Inf_L         | T3G              | Temporal    |
| Amygdala_R             | AMYGDD           | Temporal    | Temporal_Inf_R         | T3D              | Temporal    |
| Calcarine_L            | V1G              | Occipital   |                        |                  |             |
| Calcarine_R            | V1D              | Occipital   |                        |                  |             |
| Cuneus_L               | QG               | Occipital   |                        |                  |             |
| Cuneus_R               | QD               | Occipital   |                        |                  |             |
| Lingual_L              | LINGG            | Occipital   |                        |                  |             |
| Lingual_R              | LINGD            | Occipital   |                        |                  |             |

AAL, automated anatomical labeling.
